# Supplementary material for: PCLO Variants Are Nominally Associated With Early-Onset Type 2 Diabetes and Insulin Resistance in Pima Indians
Source: Oxford University Press journal article supplement (doi:10.2337/db07-1800), 2008-07-23

**Supplemental Table 1**. SNPs genotyped across the *PCLO* gene region and their association with early-onset type 2 diabetes in a case/control study of Pima Indians.

SNP location is based on NCBI Builder 36.2. *P* values are given for an additive model (*P* add) and a recessive model (*P* rec) for both a general case/control association and a within family association. All *P* are adjusted for gender, birth year, and family membership. Allele 1: major allele; Allele 2: minor allele.

| SNP | NCBI  location | Allele | | Major allele  Frequency | Case/Control | | Within-family | |
| --- | --- | --- | --- | --- | --- | --- | --- | --- |
| 1 | 2 | *P* add | *P* rec | *P* add | *P* rec |
| rs2522830 | 82281039 | A | G | 0.72 | 0.65 | 0.55 | 0.12 | 0.07 |
| rs2715148 | 82287971 | C | A | 0.71 | 0.36 | 0.35 | 0.20 | 0.17 |
| rs2522832 | 82288300 | G | A | 0.71 | 0.66 | 0.67 | 0.23 | 0.17 |
| rs1044639 | 82289494 | C | A | 0.58 | 0.10 | 0.14 | 0.66 | 0.07 |
| rs2522833 (Ser4684Ala) | 82291644 | C | A | 0.58 | 0.13 | 0.08 | 0.48 | 0.03 |
| rs2371214 | 82292608 | C | T | 0.70 | 0.23 | 0.19 | 0.30 | 0.12 |
| rs2715150 | 82293831 | G | A | 0.58 | 0.08 | 0.10 | 0.57 | 0.04 |
| rs2715151 | 82294599 | G | C | 0.71 | 0.40 | 0.33 | 0.22 | 0.06 |
| rs2715153 | 82295794 | T | C | 0.72 | 0.44 | 0.43 | 0.17 | 0.08 |
| rs2715154 | 82298802 | T | G | 0.72 | 0.16 | 0.20 | 0.20 | 0.13 |
| rs2715155 | 82299990 | G | A | 0.58 | 0.07 | 0.09 | 0.72 | 0.06 |
| rs2301722 | 82303170 | A | C | 0.86 | 0.12 | 0.10 | 0.92 | 0.45 |
| rs2257207 | 82306120 | T | A | 0.57 | 0.06 | 0.12 | 0.60 | 0.05 |
| rs2715157 | 82306310 | G | A | 0.70 | 0.24 | 0.23 | 0.21 | 0.07 |
| rs2715158 | 82307542 | C | G | 0.57 | 0.13 | 0.10 | 0.82 | 0.06 |
| rs2522838 | 82313493 | A | T | 0.62 | 0.04 | 0.09 | 0.85 | 0.18 |
| rs2522840 | 82316351 | G | T | 0.61 | 0.03 | 0.06 | 0.88 | 0.15 |
| rs2522844 | 82318028 | T | C | 0.62 | 0.05 | 0.09 | 0.86 | 0.20 |
| rs7792042 | 82322679 | G | A | 0.83 | 0.17 | 0.15 | 0.92 | 0.95 |
| intron insAT | 82323724 | - | Ins | 0.62 | 0.04 | 0.09 | 0.85 | 0.18 |
| rs12707524 | 82324551 | A | G | 0.86 | 0.06 | 0.05 | 0.24 | 0.37 |
| rs4377905 | 82332247 | A | G | 0.87 | 0.40 | 0.35 | 0.88 | 0.84 |
| rs12707530 | 82335908 | G | A | 0.75 | 0.09 | 0.11 | 0.92 | 0.87 |
| rs10499871 | 82336411 | T | C | 0.90 | 0.39 | 0.50 | 0.66 | 0.98 |
| rs2888018 | 82339226 | T | G | 0.76 | 0.09 | 0.10 | 0.78 | 0.91 |
| rs2888019 | 82341345 | C | T | 0.71 | 0.07 | 0.15 | 0.60 | 0.51 |
| rs2371365 | 82344834 | T | C | 0.75 | 0.01 | 0.01 | 0.95 | 0.94 |
| rs13237603 | 82352074 | T | C | 0.78 | 0.33 | 0.33 | 0.76 | 0.67 |
| rs7810801 | 82353878 | C | T | 0.76 | 0.02 | 0.02 | 0.98 | 1.00 |
| rs6965423 | 82354466 | C | T | 0.69 | 0.05 | 0.12 | 0.23 | 0.22 |
| rs2371367 | 82356327 | C | A | 0.67 | 0.05 | 0.16 | 0.30 | 0.31 |
| rs2189972 | 82362599 | C | T | 0.66 | 0.06 | 0.13 | 0.44 | 0.17 |
| rs2371368 | 82370307 | A | G | 0.66 | 0.04 | 0.09 | 0.62 | 0.41 |
| rs11765159 | 82371599 | G | A | 0.70 | 0.12 | 0.19 | 0.64 | 0.43 |
| rs11762318 | 82371858 | A | C | 0.69 | 0.07 | 0.13 | 0.39 | 0.25 |
| rs10808302 | 82372651 | A | C | 0.70 | 0.09 | 0.19 | 0.30 | 0.24 |
| rs2107825 | 82389202 | A | T | 0.67 | 0.05 | 0.12 | 0.88 | 0.54 |
| rs12539066 | 82391885 | T | C | 0.67 | 0.02 | 0.04 | 0.32 | 0.19 |
| rs2107828 | 82393605 | T | A | 0.69 | 0.03 | 0.07 | 0.14 | 0.13 |
| rs10954694 | 82395097 | C | T | 0.54 | 0.09 | 0.06 | 0.97 | 0.17 |
| rs10954695 | 82395164 | A | G | 0.54 | 0.04 | 0.04 | 0.94 | 0.15 |
| rs10487645 | 82397227 | T | C | 0.85 | 0.31 | 0.31 | 0.25 | 0.61 |
| rs9690648 | 82399260 | T | C | 0.87 | 0.09 | 0.10 | 0.97 | 0.63 |
| rs6959723 | 82400276 | A | G | 0.71 | 0.19 | 0.21 | 0.16 | 0.15 |
| rs6946596 | 82400359 | A | T | 0.65 | 0.06 | 0.06 | 0.21 | 0.21 |
| rs7781142 | 82401047 | G | A | 0.65 | 0.05 | 0.04 | 0.07 | 0.08 |
| rs7799260 | 82401452 | G | C | 0.65 | 0.05 | 0.05 | 0.07 | 0.09 |
| rs6961446 | 82406015 | C | T | 0.65 | 0.05 | 0.04 | 0.1 | 0.10 |
| rs2057889 | 82413494 | A | T | 0.67 | 0.07 | 0.12 | 0.05 | 0.07 |
| rs976714 (Ala2742Thr) | 82419795 | A | G | 0.50 | 0.004 | 0.004 | 0.16 | 0.02 |
| rs10954696 (Val2413Ile) | 82420782 | A | G | 0.50 | 0.01 | 0.009 | 0.13 | 0.03 |
| rs10487648 | 82421545 | A | C | 0.98 | 0.57 | 0.57 | 0.48 | 0.48 |
| rs7808548 | 82454100 | A | G | 0.71 | 0.17 | 0.29 | 0.58 | 0.44 |
| rs12530517 | 82470335 | T | C | 0.58 | 0.02 | 0.03 | 0.36 | 0.08 |
| rs28156 | 82484146 | T | C | 0.94 | 0.65 | 0.74 | 0.17 | 0.26 |
| rs41610 | 82490956 | C | T | 0.94 | 0.20 | 0.24 | 0.03 | 0.04 |
| rs10487656 | 82538037 | G | A | 0.57 | 0.006 | 0.009 | 0.12 | 0.02 |
| rs6950504 | 82542501 | A | G | 0.61 | 0.005 | 0.004 | 0.54 | 0.04 |
| rs12667913 | 82548699 | A | C | 0.57 | 0.02 | 0.02 | 0.25 | 0.11 |
| rs727494 | 82550235 | T | G | 0.56 | 0.02 | 0.01 | 0.36 | 0.05 |
| rs10487657 | 82551084 | C | T | 0.62 | 0.007 | 0.002 | 0.32 | 0.17 |
| rs2023984 | 82564999 | T | C | 0.62 | 0.02 | 0.02 | 0.85 | 0.79 |
| rs6943995 | 82579698 | C | T | 0.52 | 0.02 | 0.14 | 0.09 | 0.58 |
| rs6975891 | 82584252 | T | C | 0.54 | 0.07 | 0.02 | 0.78 | 0.46 |
| rs6968150 | 82608582 | T | G | 0.70 | 0.05 | 0.01 | 0.61 | 0.93 |
| 10 aa insert. codon375 | 82622768 | - | I | 0.64 | 0.61 | 0.74 | 0.69 | 0.71 |
| Novel (Asp287Gly) | 82623033 | A | G | 0.88 | 0.15 | 0.12 | 0.97 | 0.82 |
| rs4341113 | 82629338 | A | C | 0.66 | 0.05 | 0.11 | 0.47 | 0.40 |
| rs4732502 | 82634345 | G | A | 0.67 | 0.009 | 0.001 | 0.65 | 0.91 |
| rs4129230 | 82636908 | A | T | 0.65 | 0.009 | 0.001 | 0.53 | 0.93 |
| rs4543487 | 82641622 | C | T | 0.58 | 0.06 | 0.58 | 0.85 | 0.67 |
| rs7457648 | 82649845 | C | T | 0.58 | 0.09 | 0.64 | 0.98 | 0.62 |
| rs7384721 | 82653913 | T | C | 0.64 | 0.009 | 0.01 | 0.32 | 0.74 |
| rs10249827 | 82657851 | A | G | 0.59 | 0.03 | 0.003 | 0.46 | 0.63 |
| rs7795829 | 82661860 | T | C | 0.57 | 0.11 | 0.67 | 0.87 | 0.47 |
| rs11773318 | 82679149 | A | G | 0.73 | 0.18 | 0.13 | 0.30 | 0.20 |
| rs2189093 | 82680353 | A | G | 0.88 | 0.24 | 0.25 | 0.93 | 0.93 |
| rs7776493 | 82680684 | T | C | 0.70 | 0.76 | 0.48 | 0.42 | 0.42 |
| rs1557785 | 82682310 | A | G | 0.68 | 0.55 | 0.32 | 0.88 | 0.68 |
| rs2189090 | 82683267 | C | T | 0.88 | 0.51 | 0.40 | 0.64 | 0.71 |
| rs7779384 | 82686266 | T | C | 0.57 | 0.25 | 0.32 | 0.59 | 0.56 |
| rs6945119 | 82693228 | C | T | 0.60 | 0.18 | 0.05 | 0.64 | 0.67 |
| rs13228801 | 82695907 | C | A | 0.87 | 0.52 | 0.56 | 0.90 | 0.90 |
| rs12538947 | 82700897 | C | T | 0.55 | 0.48 | 0.17 | 0.82 | 0.88 |
| rs16887434 | 82703013 | G | T | 0.69 | 0.54 | 0.31 | 0.80 | 0.77 |
| rs2189113 | 82715219 | A | T | 0.62 | 0.40 | 0.22 | 0.50 | 0.99 |
| rs2709887 | 82718286 | C | T | 0.70 | 0.91 | 0.97 | 0.23 | 0.41 |
| rs6974772 | 82722282 | T | C | 0.88 | 0.09 | 0.07 | 0.99 | 0.92 |
| rs2244639 | 82731615 | A | G | 0.82 | 0.78 | 0.42 | 0.35 | 0.40 |
| rs10954716 | 82735357 | C | T | 0.68 | 0.85 | 0.49 | 0.76 | 0.55 |
| rs764233 | 82739794 | T | C | 0.71 | 0.75 | 0.46 | 0.95 | 0.51 |
| rs2246533 | 82761949 | C | A | 0.85 | 0.71 | 0.45 | 0.19 | 0.35 |
| rs2709914 | 82771544 | G | C | 0.50 | 0.26 | 0.18 | 0.19 | 0.40 |
| rs2709907 | 82778235 | A | C | 0.52 | 0.19 | 0.08 | 0.34 | 0.73 |
| rs2709905 | 82779507 | C | T | 0.51 | 0.05 | 0.04 | 0.55 | 0.68 |
| rs10266361 | 82785004 | T | C | 0.51 | 0.08 | 0.05 | 0.28 | 0.40 |
| rs4728532 | 82786370 | G | T | 0.51 | 0.19 | 0.25 | 0.58 | 0.99 |
| rs4416775 | 82789830 | A | G | 0.52 | 0.09 | 0.05 | 0.24 | 0.33 |
| rs10226944 | 82794825 | C | T | 0.73 | 0.14 | 0.39 | 0.41 | 0.50 |
| rs10270433 | 82801056 | A | T | 0.76 | 0.84 | 0.73 | 0.74 | 0.77 |
| rs11974043 | 82804330 | A | G | 0.74 | 0.05 | 0.18 | 0.17 | 0.29 |
| rs9690908 | 82806274 | G | A | 0.84 | 0.48 | 0.85 | 0.31 | 0.31 |
| rs10234926 | 82822763 | A | G | 0.90 | 0.50 | 0.43 | 0.57 | 0.58 |
| rs2722961 | 82823010 | C | T | 0.90 | 0.56 | 0.49 | 0.93 | 0.78 |
| rs2371656 | 82828913 | A | G | 0.90 | 0.54 | 0.48 | 0.74 | 0.57 |

**Supplemental Figure 1.** Linkage disequilibrium (LD) pattern across *PCLO* in Pima Indians.

D’ and r2 were calculated on the SNPs listed in Online Table 1. SNPs discussed in the manuscript (rs976714=Ala2742Thr, rs10954696=Val2413Ile, rs10487656, rs6950504) are indicated by green boxes. All LD plots were generated using HaploView (http://www.broad.mit.edu/mpg/haploview/)


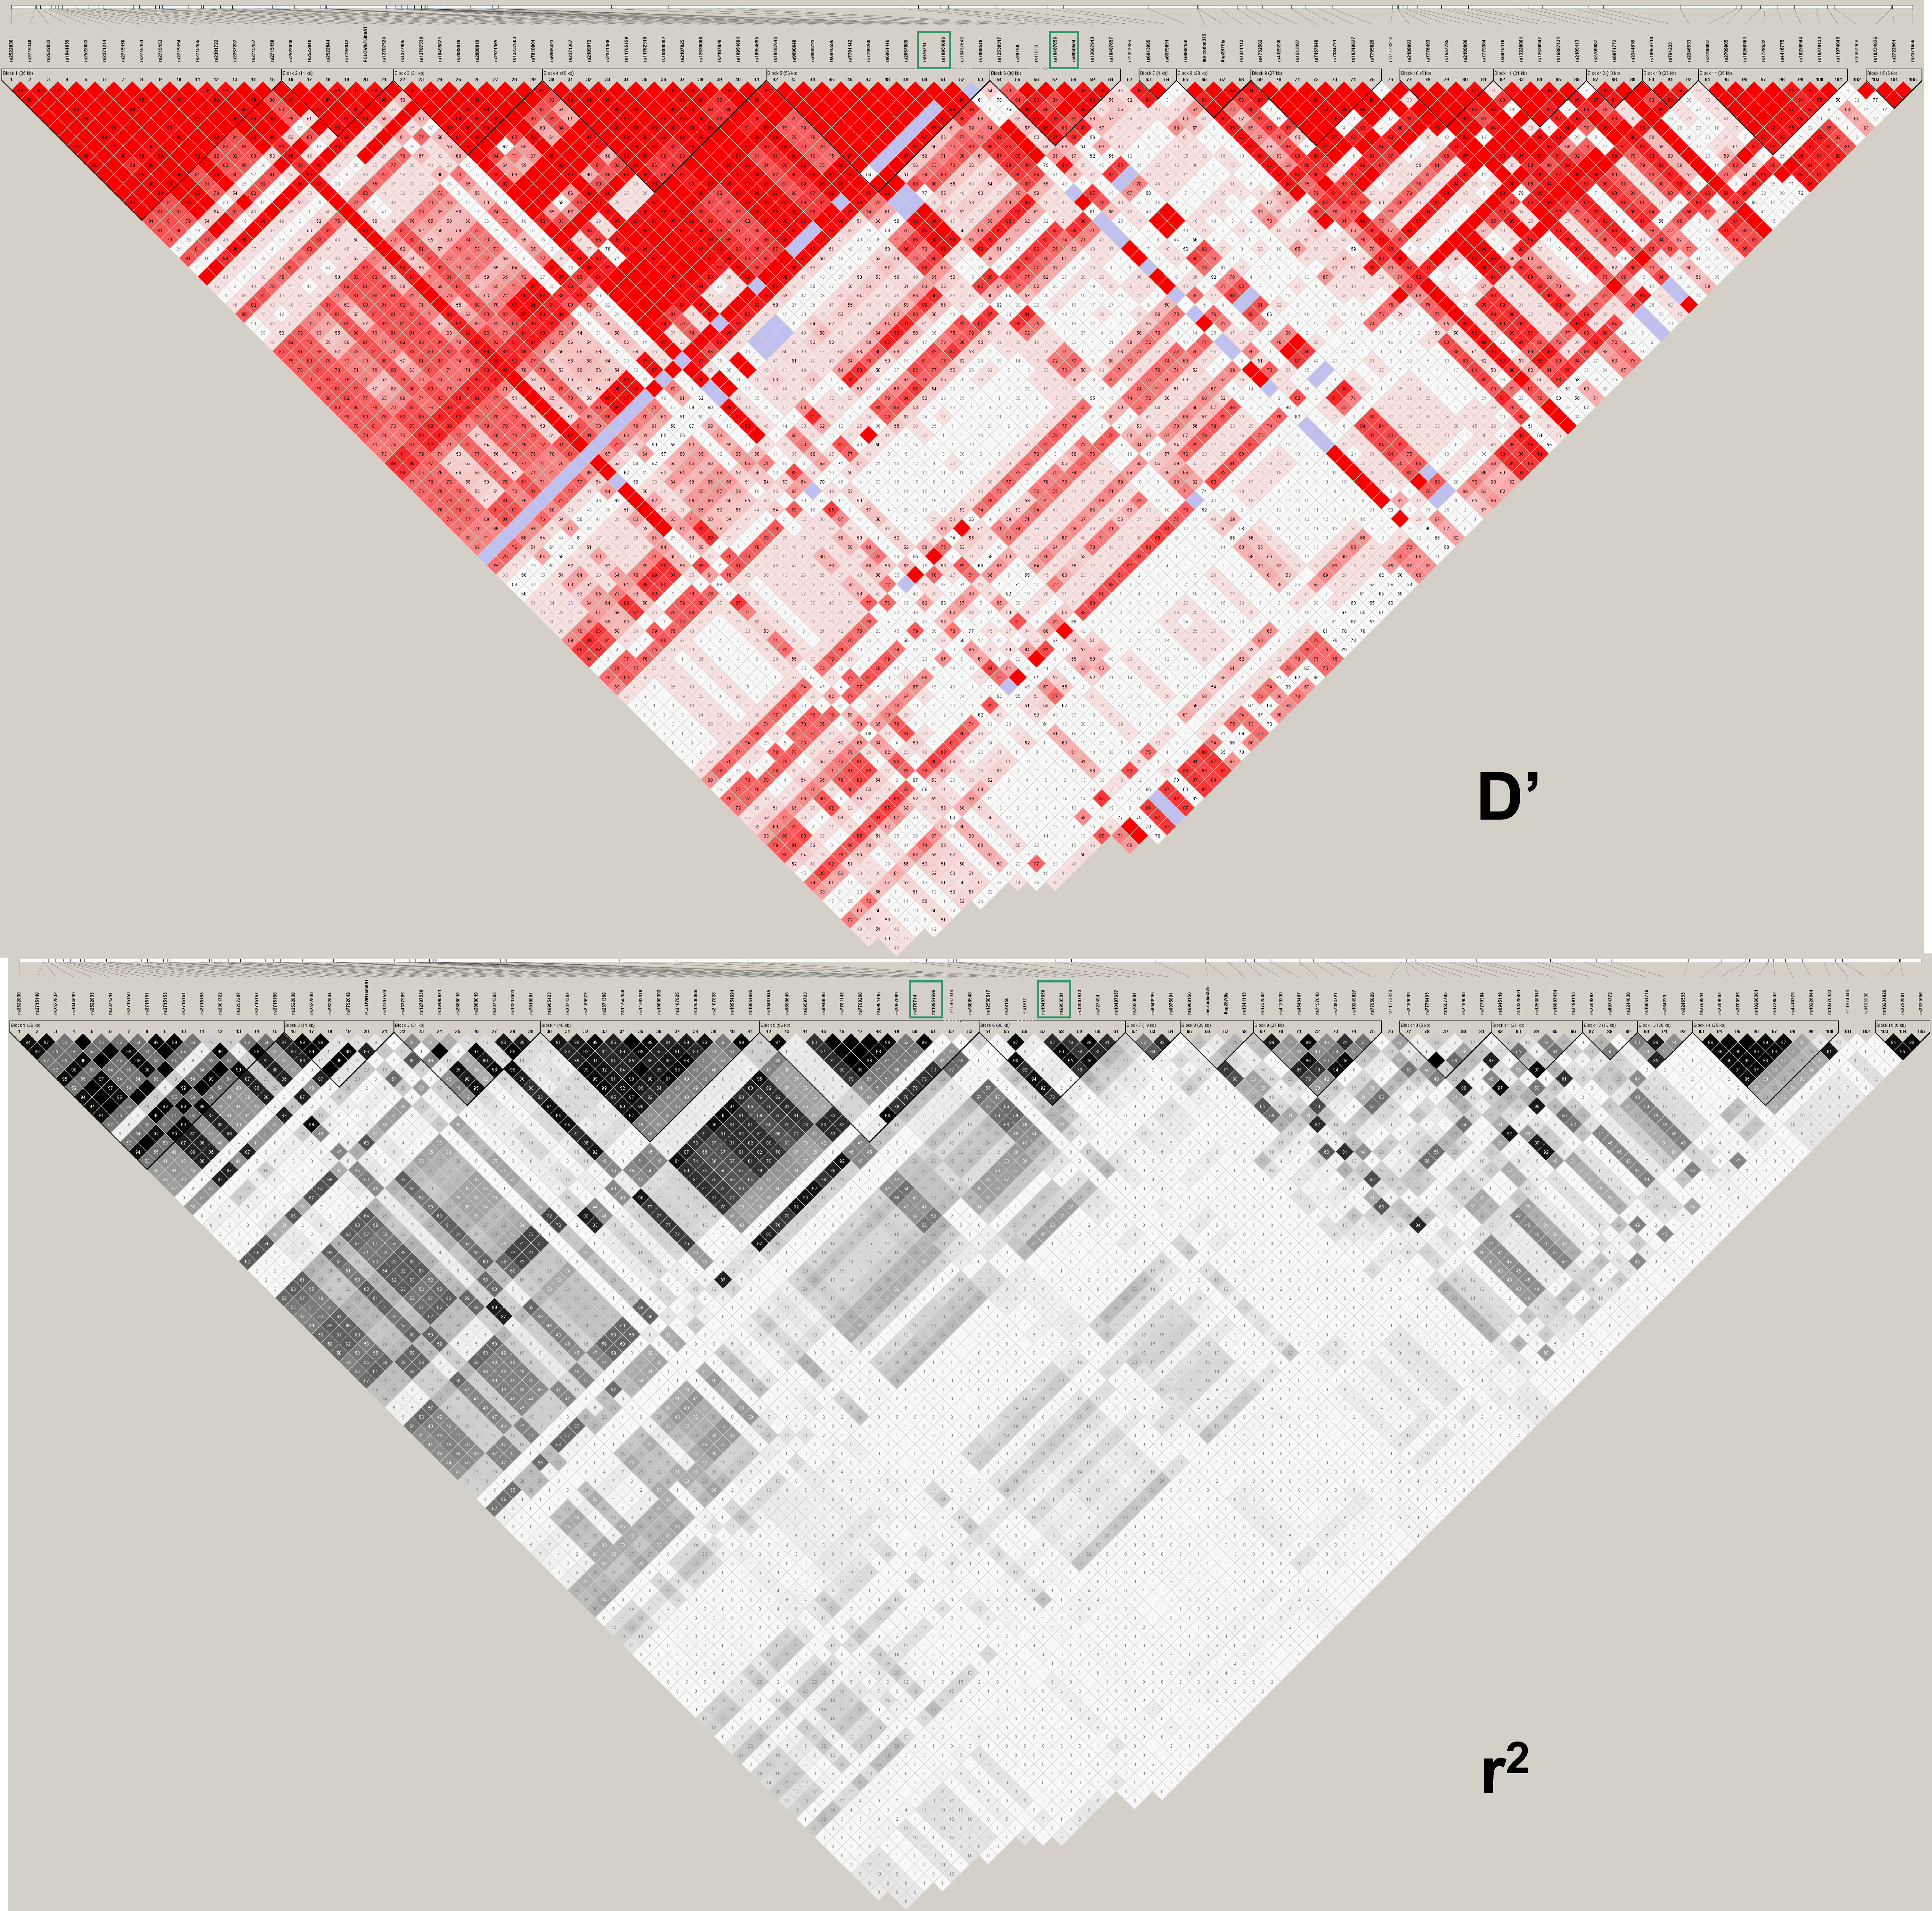


**Supplemental Figure 2.** *PCLO* expression profile in cDNA from various human tissues.


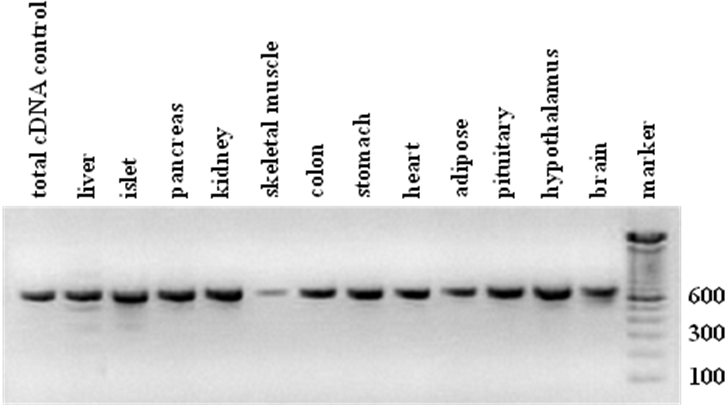

Supplement: db07-18001_suppl.doc [file db07-18001_suppl.doc]
